# Supplementary material for: In Vivo Mn-Enhanced MRI for Early Tumor Detection and Growth Rate Analysis in a Mouse Medulloblastoma Model
Source: PubMed Central journal article supplement — Neoplasia. 2014 Dec 9;16(12):993–1006. doi: 10.1016/j.neo.2014.10.001 (PMC4309249; doi:10.1016/j.neo.2014.10.001), 2014-12-09
Supplement: mmc1.pdf [file mmc1.pdf]

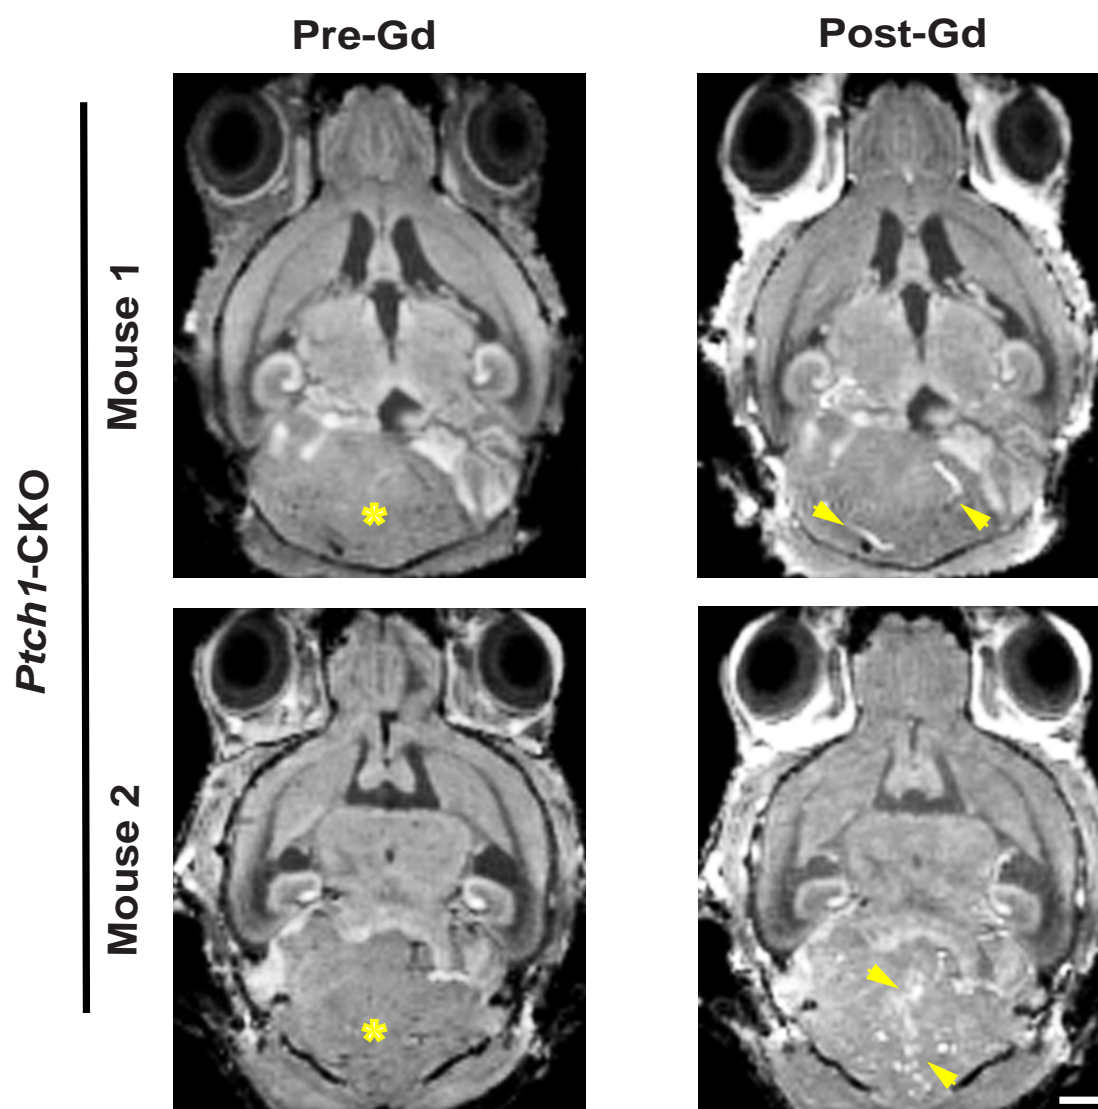

**Supplemental Figure 1: Gd-enhancement in MB tumors in Ptch1-CKO mice.**

MEMRI images were acquired using the 15-minute 3D T1w sequence (see Methods), 24h after intra-peritoneal (IP) injection of a standard dose of MnCl<sub>2</sub>. The resulting pre-gadolinium (Gd) images demonstrated advanced MB tumors (\*) in each Ptch1-CKO mouse (N=6). Post-Gd images (right panels) were then acquired from each mouse during the same imaging session, immediately after intra-venous IV injection of Gd-DTPA (Magnevist; 0.1 mM/kg dose) using a tail vein catheter. The post-Gd images showed heterogenous increase in signal intensity (yellow arrows) within each of the tumors, similar to previous reports (e.g., Nelson et al, J Neurooncology 2003; Reference [37]). Brain tumor uptake of Gd-DTPA has generally been related to contrast leakage due to disruption of the blood-brain-barrier (BBB) or abnormal tumor vessels, which can differ between individual tumors and tumor type. In the Ptch1-CKO MB tumors, Gd-enhanced MRI was clearly less useful than MEMRI for determining the tumor margins and to assess tumor volume longitudinally, and was therefore not pursued further.

## Supplemental Table 1

Age is not a good predictor of tumor and brain ventricle volume in Ptch1-CKO mice.

| Weeks | N       | Tumor Volume (mm <sup>3</sup> ) |       |       |       | Brain Ventricle Volume <sup>a</sup> (mm <sup>3</sup> ) |       |      |      |
|-------|---------|---------------------------------|-------|-------|-------|--------------------------------------------------------|-------|------|------|
|       |         | Min                             | Max   | Mean  | SD    | Min                                                    | Max   | Mean | SD   |
| 11-15 | 20      | 19.2                            | 368.7 | 114.3 | 85.2  | 11.3                                                   | 112.7 | 34.9 | 22.9 |
| 16-20 | 19      | 39.1                            | 420.5 | 104.9 | 88.3  | 3.2                                                    | 207.4 | 36.7 | 45.4 |
| 21-25 | 6       | 26.0                            | 380.9 | 156.6 | 129.1 | 8.8                                                    | 148.8 | 45.1 | 53.0 |
| 26    | Mouse 1 | -                               | -     | 49.7  | -     | -                                                      | -     | 51.1 | -    |
| 28    | Mouse 2 | -                               | -     | 24.0  | -     | -                                                      | -     | 6.1  | -    |

<sup>a</sup> Normal ventricle volume = 2.67 ± 1.70 mm<sup>3</sup> (N=5)
